# 1 **Engineering Transcriptional Interference through RNA Polymerase**

## 2 **Processivity Control**

3 Nolan J. O'Connor<sup>1</sup>, Antoni E. Bordoy<sup>1</sup>, and Anushree Chatterjee<sup>1,2,3\*</sup>

4 <sup>1</sup>Department of Chemical and Biological Engineering, University of Colorado Boulder, Colorado  
5 80303, USA.

6 <sup>2</sup>Antimicrobial Regeneration Consortium, Boulder, Colorado 80301, USA.

7 <sup>3</sup>Sachi Bioworks, Inc., Boulder, Colorado 80301, USA.

8 \*Corresponding author email: [chatterjee@colorado.edu](mailto:chatterjee@colorado.edu)

### 9 **ABSTRACT**

10 Antisense transcription is widespread in all kingdoms of life and has been shown to influence gene  
11 expression through transcriptional interference (TI), a phenomenon in which one transcriptional  
12 process negatively influences another *in cis*. The processivity, or uninterrupted transcription, of an  
13 RNA Polymerase (RNAP) is closely tied to levels of antisense transcription in bacterial genomes,  
14 but its influence on TI, while likely important, is not well-characterized. Here we show that TI can  
15 be tuned through processivity control via three distinct antitermination strategies: the antibiotic  
16 bicyclomycin, phage protein *Psu*, and ribosome-RNAP coupling. We apply these methods toward  
17 TI and tune ribosome-RNAP coupling to produce 38-fold gene repression due to RNAP collisions.  
18 We then couple protein roadblock and RNAP collisions to design minimal genetic NAND and  
19 NOR logic gates. Together these results show the importance of processivity control for strong TI  
20 and demonstrate the potential for TI to create sophisticated switching responses.

### 21 **INTRODUCTION**

22 Antisense transcription is widespread in all kingdoms of life. While once attributed largely to  
23 transcriptional noise from hidden or cryptic promoters (1), antisense transcription is now

24 understood to govern important cellular decisions—for example, meiotic entry in *S. cerevisiae* (2),  
25 senescence effects in fibroblast cells (3), and antibiotic resistance plasmid conjugation in *E.*  
26 *faecalis* (4). More recently, high-resolution transcript mapping in bacteria has shown that antisense  
27 transcription delineates gene boundaries through bidirectional termination of transcription (5).  
28 Rho-dependent transcriptional termination is understood to suppress antisense transcription in  
29 bacteria (6), but antisense transcription has still been shown to regulate gene expression throughout  
30 the genome (5, 7).

31 There are two known modes of transcriptional regulation by antisense transcription: antisense  
32 RNA (asRNA) regulation, where sense and antisense RNAs hybridize to promote RNase-  
33 mediated degradation or block the ribosome binding site to prevent its translation (8–10), and  
34 collisions of the transcriptional machinery originated from sense and antisense promoters, termed  
35 transcriptional interference (TI) (8, 10–12). Three primary modes of TI—RNA Polymerase  
36 (RNAP) collisions, sitting duck, and promoter occlusion—have been proposed (11) and parsed  
37 through experiments (13) and mathematical modeling (9, 14). Direct contact of bacterial RNAPs  
38 has not been observed during head-on RNAP collisions (15), and it is generally understood that  
39 interference of one RNAP on another may be mediated through DNA supercoiling (16, 17) rather  
40 than due to direct collisions of transcriptional machinery. Consequently, the act of cis-antisense  
41 transcription has been shown to reliably down-regulate gene expression (9, 13, 18–22).

42 While previous TI studies have thoroughly investigated the genetic architectures that influence the  
43 frequency of collisions—elements such as interfering and expressing promoter strength (18–20)  
44 and inter-promoter distance (20)—little attention has been paid to the number of transcription  
45 elongation factors that associate with RNAP during transcription. These proteins—such as NusG,  
46 which bridges an RNAP and ribosome during the pioneering round of transcription and, in the

47 absence of a co-translating ribosome, facilitates Rho termination (6, 23, 24)—affect the  
48 processivity, i.e. the uninterrupted transcription, of an RNAP. Recent transcriptomic studies in  
49 bacteria have linked antisense transcription to Rho termination and the modulation of RNAP  
50 processivity (5–7, 25, 26), highlighting the importance of RNAP processivity to TI over protein  
51 coding sequences. For example, a head-on collision event between an ‘interfering’ RNAP  
52 transcribing an untranslated region and an ‘expressing’ RNAP that is coupled to a co-translating  
53 ribosome is likely biased toward the latter due to Rho termination of the former (Fig. 1a). We  
54 hypothesized that protecting interfering RNAPs from Rho termination through processivity control  
55 (Fig. 1a) could improve the strength of TI and enable its engineering for higher-order switching  
56 responses.

57 Here, we show that engineering processivity control of the interfering RNAP can tune TI. We  
58 demonstrate processivity control through the use of three antitermination mechanisms: the  
59 antibiotic bicyclomycin (27), expression of the phage polarity suppression protein *Psu* (28–30),  
60 and a co-translating ribosome (21, 31, 32) improve the strength of RNAP collisions (21, 23, 31).  
61 We engineer convergent gene constructs that permit an interfering RNAP-ribosome complex  
62 (‘expressome’(33)) to enter the opposing gene’s open reading frame, causing strong repression of  
63 gene expression, and creating, to our knowledge, the first synthetic expressome-on-expressome  
64 collision system. We show that processivity control, when coupled with control of interfering and  
65 expressing promoters (Fig. 1a) creates a layered, tunable TI system. We then apply these design  
66 rules to build two-input, minimal NAND and NOR transcriptional logic gates that couple protein  
67 roadblock with TI collisions. Together, our results demonstrate the importance of processivity  
68 control for tuning and engineering strong TI.

## 69 MATERIALS AND METHODS

## 70 **Plasmids**

71 Constructs containing fluorescent modules were cloned into pZE21MCS (Expressys) through  
72 restriction enzyme cloning and Gibson Assembly. SalI and BamHI were used for the insertion of  
73 GFP. GFP was obtained from pAKgfp1 (Addgene #14076). mCherry was obtained from PFPV-  
74 mCherry (Addgene #20956). BamHI and MluI were used to invert GFP for NAND and NOR  
75 constructs. ApaI was used to insert LuxR. NotI and AgeI were used to insert pLux. All restriction  
76 enzymes were purchased from Thermo Fisher. Insertion of *psu* was performed using a single-  
77 enzyme PciI digestion with FastAP. pBad promoters with araC were sourced from pX2\_Cas9 and  
78 inserted using Gibson assembly. Primers for Gibson reactions are available upon request. The  
79 plasmid containing *Psu*, pHL 2067, was generously provided by Dr. Han Lim through Addgene.  
80 Point mutations to introduce stop codons into antisense *mCherry* and create orthogonal araC\*  
81 mutants were performed using a Quikchange (Agilent) PCR protocol. Single base-pair mismatches  
82 in forward and reverse primers were used in a modified PCR cycle to create mismatches, and DpnI  
83 was used to digest any original template.

## 84 **Strains and cell culture**

85 Cloning and experiments to show logic behavior using TI with GFP and mCherry were performed  
86 in *E. coli* strain DH5 $\alpha$ Z1 (Expressys). Transformation colonies were grown in Luria-Bertani (LB)  
87 and agar plates supplemented with kanamycin (50  $\mu$ g/mL).

## 88 **GFP and mCherry induction assays**

89 Individual colonies were picked from LB and agar plates supplemented 50  $\mu$ g/mL kanamycin and  
90 incubated for 16 h at 37 °C under orbital shaking at 200 rpm. Then, the cells were diluted 1:10 into  
91 fresh LB media supplemented with 50  $\mu$ g/mL kanamycin. Induction was performed at various

92 inducer concentrations using anhydrous tetracycline (aTc), isopropyl  $\beta$ -D-1-thiogalactopyranoside  
93 (IPTG), 3-oxo-dodecanoyl-L-homoserine lactone (AHL). AHL powder was dissolved in a solution  
94 of 99.99% ethyl acetate and 0.01% glacial acetic acid, aliquoted as needed, and stored long term  
95 at -20 °C. Cells were grown for 6-8 h at 37 °C under shaking in a flat bottom 96-well plate in a  
96 microplate reader (Tecan Genios). Optical density at 590 nm was measured during induction.  
97 Following the growth period, the cells were transferred to a V-bottom 96-well plate and pelleted  
98 by centrifugation of the plate at 4000 rpm for 5 minutes at 4 °C. The supernatant was removed by  
99 vigorously inverting the plate and then the pellets were resuspended in 100  $\mu$ L PBS+4%  
100 formaldehyde and transferred to a flat bottom plate, which was then stored at 4 °C prior to flow  
101 cytometry measurements.

#### 102 *Bicyclomycin (BCM) Treatments*

103 50 ng/mL bicyclomycin (Santa Cruz Biotechnology) was added along with other inducers (aTc,  
104 IPTG, AHL) after 3 hours of growth under orbital shaking at 200 rpm in LB+Kan following a 1:10  
105 dilution of overnight cultures grown for 16 hours. Cells were grown for an additional 3 hours  
106 before being washed and fixed in PBS+4% formaldehyde and subsequently measured with flow  
107 cytometry.

#### 108 *Psu Experiments*

109 To mitigate the adverse growth effects of high Psu expression, inducers were added to microplate  
110 wells (to achieve a total volume of 100  $\mu$ L) after 2 hours of growth under orbital shaking at 200  
111 rpm in LB+Kan following a 1:10 dilution of overnight cultures grown for 16 hours. Cells were  
112 grown for an additional 4 hours before being washed and fixed in PBS+4% formaldehyde and  
113 subsequently measured with flow cytometry.

## 114 **Flow cytometry**

115 Before fluorescence measurements conducted with a FACSCelesta instrument, samples were  
116 diluted 1:50 in PBS. The 588B 530/30V (800 V) channel was used to measure GFP levels.  
117 FSC-V=420 V, SSC-V=260 V, FSC-Threshold= 8000, SSC-Threshold= 200. For each sample,  
118 50,000 cells were measured. At least four biological replicates were collected for each construct.  
119 Data was analyzed using FlowCytometryTools package in Python 3.7. Statistical differences were  
120 examined using the Mann-Whitney *U* test.

121 To calculate the TI fold-change for a particular construct or set of conditions, mean fluorescence  
122 values of biological replicates (minimum 3) were averaged and used in the following equation:

$$123 \quad \text{TI fold - change} = \frac{\text{Fluorescence}_{\text{AHL only}}}{\text{Fluorescence}_{\text{AHL+aTc+IPTG}}} \quad (1)$$

## 124 **Strand-specific qPCR**

### 125 *Growth experiment and RNA isolation*

126 1 mL overnights in LB media supplemented with 50 µg/mL kanamycin were grown for at 37 °C  
127 under orbital shaking 16 hours. Overnight cultures were diluted 1:50 into LB media with 50 µg/mL  
128 kanamycin and relevant inducers (aTc, IPTG, AHL) and grown for 6 hours at 37 °C with orbital  
129 shaking at a total volume of 1.5 mL. Cell pellets were spun down for 2 minutes at 12000 rcf,  
130 supernatant was removed, and pellets were stored at -80 °C prior to RNA extraction. RNA was  
131 extracted and purified using GeneJET RNA Purification Kit (Thermo Fisher). Total RNA was  
132 digested with DNase I at 37 °C for 30 minutes and subsequently repurified.

### 133 *cDNA synthesis*

134 cDNA synthesis was carried out using High Capacity cDNA Reverse Transcription Kit (Applied  
135 Biosystems). Gene-specific primers corresponding to the antisense *mCherry* sequence were used  
136 to prime cDNA synthesis. 2  $\mu$ L of primer at 10  $\mu$ M and ~500 ng of RNA were added to the 24  $\mu$ L  
137 reaction. cDNA synthesis was carried out using the temperature steps: 25  $^{\circ}$ C for 10 minutes; 37  
138  $^{\circ}$ C for 2 hours, 85 C for 5 minutes, 4  $^{\circ}$ C hold.

### 139 *RT-qPCR*

140 RT-qPCR was carried out using FastStart Universal SYBR Green Master Mix (Rox) (Sigma  
141 Aldrich) in an Applied Biosystems QuantStudio 6. 1.5  $\mu$ L of cDNA, 1  $\mu$ L reverse and forward  
142 primers were added to each 10  $\mu$ L reaction. *Kanamycin* was used as a reference housekeeping gene  
143 for each construct. Threshold values were normalized to *Kan* ( $\Delta C_T$ ), and these  $\Delta C_T$  values for *gfp-*  
144 *mCherry* and *gfp\*-mCherry* (Fig. 2d) or no aTc+IPTG and aTc+IPTG (Fig. 2e) were compared  
145 ( $\Delta\Delta C_T$ ). Error from biological replicates was propagated through the normalization and  
146 comparisons. Fold-change error bounds are reported as  $2^{-(\Delta\Delta C_T + sd)}$  and  $2^{-(\Delta\Delta C_T - sd)}$  calculated  
147 comparing the  $C_T$  values for *gfp-mCherry* and *gfp\*-mCherry* (Fig. 2d) or no aTc+IPTG to 100  
148 ng/mL aTc + 1 mM IPTG (Fig. 2e).

## 149 **RESULTS**

### 150 **Processivity control is essential for strong TI**

151 Transcriptional Interference (TI) resulting from convergent promoters has been shown to depend  
152 on levels of interference and expression control through deliberate tuning of promoter strengths  
153 (9, 18–20) (Fig. 1a). Here we chose to use an inducible promoter system in order to more easily  
154 tune their relative strengths. The quorum sensing promoter pLux, induced with AHL, is used as  
155 the “expression control” module to regulate *gfp* production. The aTc-inducible pTet is oriented

156 antisense to *gfp* and is used as the “interference control” module to downregulate *gfp* expression  
157 through antisense transcription. We added an IPTG-inducible lac operator 47 bp downstream of  
158 the pTet transcription start site (Fig. 1a) to further tune the interference control via protein  
159 roadblock (34). (DNA lengths for the relevant plasmids are illustrated in Supplementary Figure  
160 S1.)

161 We observed that at highest strength of interference, achieved when this pTet-LacO architecture  
162 (Fig. 1b) was activated with saturating aTc and IPTG in order to fire interfering RNAPs to repress  
163 GFP expression from pLux, a significant but weak ~1.6-fold change in GFP expression occurred  
164 (Equation 1, Supplementary Figure S2). The extent of this TI repression was dependent on both  
165 pTet and pLux activity (aTc and AHL concentration, respectively), decreasing with high AHL  
166 concentrations and increasing with high aTc concentrations (Supplementary Figure S2). These  
167 results demonstrate the effects of interference and expression control on TI and generally agrees  
168 with other TI studies, which have found that a strong interfering promoter and weak expressing  
169 promoter are required to produce significant TI (18–20).

170 We posited that the lack of observed strong repression from TI may be related to low processivity  
171 of the interfering RNAP. *In vivo*, elongating RNAPs interact with transcriptional factors that  
172 modulate its processivity (23). For example, the protein NusG associates with elongating RNAPs  
173 to prevent pausing and backtracking (6, 31) and aids Rho in factor-dependent termination (6) of  
174 RNAPs transcribing untranslated mRNA. Rho primarily targets RNAPs transcribing in  
175 untranslated regions of DNA in order to suppress pervasive transcription in the genome (6, 21).  
176 Because the mRNA transcribed by the interfering RNAP in this construct is not simultaneously  
177 being translated, it is susceptible to Rho termination, which may explain the relatively low levels  
178 of observed interference.



179 To test this hypothesis, we exposed exponentially growing cells to a sub-lethal dose of  
180 bicyclomycin (BCM), an antibiotic that targets the ATP turnover of Rho, thereby alleviating  
181 factor-dependent termination(35) (Fig. 1a). The interaction of Rho with BCM provides the  
182 “processivity control” in the construct. Upon BCM addition we observed a significant 4.4-fold  
183 increase in TI compared to no treatment (Fig. 1c), suggesting that Rho inhibition increases  
184 interfering RNAP processivity and allows for strong TI. Note that the condition-wide increase in  
185 GFP expression in the presence of BCM likely results from decreased termination in the 32 bp 5’  
186 UTR region of the expressing promoter. Importantly, the difference in expression between the  
187 AHL-only and AHL+aTc+IPTG (Fig. 1c) indicates an improvement in interference for RNAPs  
188 originating from pTet. These results suggest that the extent of TI can be tuned through control of  
189 RNAP processivity.

### 190 **Phage polarity suppression protein *Psu* tunes TI**

191 The manipulation of RNAP processivity using BCM suggested that the strength of RNAP  
192 collisions can be controlled through inhibition of Rho activity. To further fine-tune Rho inhibition,  
193 we incorporated the P4 phage protein *Psu* into our plasmid, under a pBad promoter  
194 (Supplementary Figure S1, Fig. 1d). Similar to BCM, *Psu* prevents Rho from translocating along  
195 the nascent mRNA through inhibition of ATP hydrolysis (28) and has previously been shown to  
196 improve RNAP processivity in *E. coli* (30). To our knowledge, *Psu* has never before been used to  
197 study TI. To reduce crosstalk between IPTG-inducible LacO and arabinose-inducible pBad, we  
198 used an *araC* mutant evolved to respond only to arabinose (36).

199 We found that, like BCM, arabinose-induced *Psu* expression both increases GFP expression and  
200 increases the fold-change in TI here to nearly 3-fold (Fig. 1e). We also found that induction of *Psu*  
201 with arabinose changed the extent of TI in a dose-dependent manner (Fig. 1f), representing a

202 tunable TI system. Interestingly, high levels of Psu induction decreased the observed levels of TI,  
203 possibly due to large overall increases in protein expression and promoter leakiness, or a global  
204 disruption in gene expression (Supplementary Figure S3). We found that toxicity of Psu expression  
205 was negligible if Psu expression was induced after 2 hours of growth under orbital shaking (OD of  
206 ~0.3) (Supplementary Figure S4). Growth effects were, however, observed when arabinose was  
207 added upon dilution from overnights, at t=0 (Materials and Methods).

208 Both BCM and Psu have previously been shown to increase transcript production for genes that  
209 were susceptible to Rho-dependent termination while leaving protein levels unchanged, likely due  
210 to exclusion of the ribosome (30) resulting from BCM or Psu locking Rho in place on the transcript  
211 (29). The observed increase in fluorescence in our system could be dependent on the 5' UTR of  
212 the fluorescent reporter, as a change in length and sequence in this region may reduce interference  
213 between Rho and the ribosome.

#### 214 **Ribosomal protection of the interfering RNAP enhances TI over a gene of interest**

215 The use of BCM and Psu disrupt Rho termination throughout the cell, limiting their applicability  
216 as processivity control strategies. We therefore sought a way to control RNAP processivity in only  
217 a gene of interest. The ribosome, when coupled with a transcribing RNAP, protects that RNAP  
218 from Rho termination, either through blockage of rho utilization sites and/or by sequestering NusG  
219 through interactions with the NusG CTD and S10 ribosomal subunit (6). Recently, direct  
220 interactions of a bacterial RNAP and ribosome have also been reported and termed the  
221 'expressome' (33). Though there exists evidence for both bridged and direct contact between the  
222 RNAP and the ribosome and it is unclear when one linkage might occur (31), we will heretofore  
223 refer to the RNAP-ribosome complex as the 'expressome'. It has been shown that co-translation  
224 of ribosomes along with elongating RNAPs can prevent the pre-mature termination of the latter by

225 precluding Rho binding (21, 23, 31, 32). Protecting the interfering RNAP from Rho termination  
226 with a co-translating ribosome in an expressome complex should therefore strengthen gene  
227 repression through TI. To this end, we created a construct of convergently oriented *gfp* and  
228 *mCherry* sequences under the control of pTet-LacO and pLux, respectively (Fig. 2a, top). At high  
229 AHL concentrations, the release of interfering RNAPs using saturating aTc and IPTG did not  
230 significantly change mCherry expression (Fig. 2b, top). Interestingly, we did observe substantial  
231 TI of GFP as a function of the interfering and expressing promoter strengths (Supplementary  
232 Figure S5), which may result from sequence differences between the two fluorescent proteins,  
233 either in the form of pause sites or Rho utilization sites.

234 In this convergent *gfp-mCherry* construct, the interfering RNAP has already decoupled from its  
235 co-translating ribosome before it transcribes into the *mCherry* ORF (Fig. 2a). This ‘naked’  
236 interfering RNAP is more exposed to Rho termination than the expressome complex, and this de-  
237 coupling of RNAP and ribosome likely explains the lack of observed TI at high AHL  
238 concentrations (Fig. 2b, top). We hypothesized that if we could prevent RNAP-ribosome de-  
239 coupling and allow the expressome enter to the *mCherry* ORF, the resulting increase in interfering  
240 RNAP processivity might strengthen TI repression of mCherry. To test this hypothesis, we mutated  
241 the stop codon of *gfp* to extend the open reading frame (ORF) of the interfering expressome into  
242 the *mCherry* ORF (Fig. 2a, middle). (Note that the notation change of *gfp* to *gfp\** reflects a  
243 complete abolition of GFP expression.) This point mutation resulted in significant, ~6-fold gene  
244 repression (Fig. 2b, middle) due to the improved processivity of the interfering RNAP when  
245 coupled with a co-translating ribosome. Interestingly, the mutation of the *gfp* stop codon created  
246 an ‘interfering ORF’ that extended through the antisense *mCherry* ORF and did not encounter an  
247 in-frame stop codon until 2 bp prior to the expressing promoter, pLux. Such a long ‘effective

248 interfering space' (Fig. 2a, middle) likely contributed to the improved strength of ribosome-  
249 coupled interfering RNAPs.

250 To confirm that the observed reduction in *mCherry* upon activation of pTet-LacO was due to TI,  
251 we added a strong unidirectional terminator (rrnBT1(37)) on the *gfp\** strand between the *gfp\** and  
252 *mCherry* sequences (Fig. 2a, bottom) in order to block interfering expressomes from entering the  
253 mCherry ORF. Note that this terminator does not introduce any stop codons into the interfering  
254 ORF and therefore maintains the interfering expressome course required for strong repression in  
255 this construct (Fig. 2b). We observed no significant TI when the interfering pTet-LacO module  
256 was induced with saturating aTc and IPTG (Fig. 2b, bottom), indicating that interactions between  
257 transcriptional machinery are likely responsible for the observed gene repression in the *gfp\**-  
258 *mCherry* construct. These results suggest that ribosome-aided RNAP processivity can create  
259 strong TI over a gene of interest.

260 To confirm that the *gfp* stop codon mutation improved RNAP processivity, we used strand-specific  
261 quantitative PCR (qPCR, Materials and Methods) to measure the abundance of transcripts  
262 antisense to *mCherry* in constructs with and without a *gfp* stop codon (Fig. 2c). Under saturating  
263 aTc and IPTG and with no AHL, we measured the relative amounts of transcripts that were long  
264 enough to contain regions 1 and 2, located 178 and 579 nts from the 3' end of *gfp* or *gfp\**,  
265 respectively. These data showed that mutating the *gfp* stop codon does not significantly change  
266 the abundance of transcripts long enough to contain region 1 but does significantly change the  
267 abundance of transcripts containing region 2, at a 6.5-fold increase (Fig. 2d). This increase in long  
268 antisense transcripts provides transcription-level evidence that the *gfp* stop codon mutation (Fig.  
269 2a) improves processivity of the interfering RNAP, as the interfering RNAP, when coupled to a  
270 ribosome, is able to transcribe further into the *mCherry* ORF on the antisense strand. This suggests

271 that the TI observed measuring mCherry protein levels (Fig. 2b) can be attributed to improved  
272 interfering RNAP processivity.

273 The TI resulting from this improved processivity of the interfering RNAP is also evident when  
274 measuring levels of *mCherry* transcript. Measuring the relative abundance of the *mCherry*  
275 transcript with saturating AHL and in the presence and absence of interfering promoter induction  
276 (with saturating aTc and IPTG) demonstrates significant, ~38-fold knockdown of the *mCherry*  
277 transcript due to TI (Fig. 2e). Amplicons on the 5' and 3' ends of the *mCherry* transcript, regions  
278 3 and 4 (Fig. 2c) were uniformly downregulated upon induction of the interfering promoter.  
279 Interestingly, in both the presence and absence of interfering promoter induction, there are ~13-  
280 fold more transcripts containing only region 3 than there are transcripts containing regions 3 and  
281 4 (Supplementary Figure S6). This suggests that a number of truncated *mCherry* transcripts are  
282 produced in the *gfp*\*-*mCherry* independent of TI. Both regions are downregulated upon interfering  
283 promoter induction, suggesting TI-induced knockdown, but the ratio between the abundances of  
284 each transcript length is maintained (Supplementary Figure S6). Premature transcriptional  
285 termination has been reported and is a function of the 5' UTR sequence and secondary structure  
286 and RBS strength (30). It is surprising, though, that TI does not affect the relative amounts of  
287 truncated transcripts, given that TI is known to create truncated transcripts (4). This result suggests  
288 that TI collisions occur upstream of region 3, toward pLux, or that TI produces truncated *mCherry*  
289 transcripts that maintain the ~13-fold difference between short and long mRNA.

### 290 **TI from ribosome-RNAP coupling is tunable through promoter control**

291 Previous TI studies have shown that the strength of RNAP collisions is a function of promoter  
292 strength (19–21). Likewise, here we find that TI in this ribosome-aided system can also be tuned  
293 through the activation of both expressing (pLux) and interfering (pTet) promoters (Figure

294 Supplementary Figure S7), demonstrating a layered response to processivity, expression, and  
295 interference control (Fig. 1a). Previous TI studies have demonstrated an inverse relationship  
296 between activating promoter strength and TI (19–21), but interestingly here we observed TI fold-  
297 change—the ratio of fluorescence observed when the interfering promoter is induced vs.  
298 uninduced (See Materials and Methods, Equation 1)—unchanged for AHL concentrations greater  
299 than 20  $\mu$ M (Supplementary Figure S8). In the absence of a LacI roadblock (at 1mM IPTG),  
300 increasing aTc concentrations reduce mCherry expression due to RNAP collisions, even at high  
301 AHL concentrations (Supplementary Figure S7). The aTc-dependence and the dependence of  
302 ribosome co-translation on TI fold-change demonstrates the importance of collision location:  
303 RNAP collisions must occur over the *mCherry* ORF—an ‘effective interfering space’ (Fig. 2a,  
304 middle)—in order to result in observable interference in this system. The coupled effects of strong  
305 interfering promoter strength (high aTc) and interfering RNAP processivity (ribosome-RNAP  
306 coupling) enable strong TI.

### 307 **TI strength is a function of the interfering expressome’s ORF length**

308 The strong TI observed when the interfering expressome is allowed to read far into the *mCherry*  
309 ORF (Fig. 2a-b, middle; Fig 2d), when contrasted with the absence of TI when the interfering  
310 expressome encountered a stop codon at the end of *gfp* (Fig. 2a-b, top; Fig 2d) suggests the  
311 importance to the length of the interfering ORF. Because the likelihood of termination increases  
312 after the interfering RNAP decouples from the translating ribosome (21), the effect of TI should  
313 be stronger the longer the RNAP and ribosome can stay coupled.

314 We tested this hypothesis by introducing stop codons into the antisense *mCherry* sequence, using  
315 codon degeneracy to retain the mCherry amino acid sequence (Fig. 3a, Supplementary Table S3).  
316 These stop codons effectively changed the length of effective interfering space from 744 nts

317 (distance from end of *gfp\** to stop codon, for the construct shown in Fig. 2) down to lengths of 36,  
318 201, 369, and 639 nts, and up to 834 nts. Transcription and translation therefore uncoupled at  
319 different points along the mCherry ORF (Fig. 3a). The positive correlation between interfering  
320 ORF length and TI fold-change (Pearson correlation coefficient=0.97, p-value<0.05) shows that  
321 the location of this uncoupling influences the extent of TI (Fig. 3b, right), with early stop codons  
322 introduced into the *mCherry* antisense sequence nearly abolishing TI and stop codons downstream  
323 of pLux achieving ~10-fold TI. This result also demonstrates that processivity control through  
324 RNAP-ribosome coupling is tunable. Notably, there was barely a trend in TI when the interfering  
325 ORF extended past the *mCherry* sequence, at approximately 700 nts, suggesting that pLux  
326 promoter occlusion was minimal here. This result agrees with previous mathematical modeling  
327 studies (9, 13), showing that RNAP collision is the dominant form of TI over large intergenic  
328 regions.

329 Reductions in gene expression due to convergently-oriented promoters are composed of both  
330 collisions of transcriptional machinery and interactions of sense and antisense RNA(8, 10, 11).  
331 Previous studies have knocked out promoters to prevent collisions of transcriptional machinery on  
332 the same strand and have found, in some cases significant asRNA interference (19, 21) or negligible  
333 asRNA interference (18). Here, we have demonstrated that gene repression due to TI can be  
334 reliably tuned through modulation of interfering RNAP processivity, through the introduction of  
335 stop codons or terminators that prevent the interfering expressome from reading into the mCherry  
336 ORF. These results suggest that collisions, not asRNA interference, are the dominant mechanism,  
337 as asRNA likely would not experience such an interfering ORF length dependence. (Further  
338 discussion on the contributions in this system of TI and asRNA interference in this system are  
339 discussed further in Supplemental Note 1.)

340 **Ribosome-protected TI and roadblock together can produce NAND/NOR logic behaviors**

341 We next sought to apply processivity control to engineer TI. A handful of prior studies have  
342 applied TI to create one-input logic gates (19), tuning of genetic switches (18, 19), and positive  
343 selection systems (20), and most recently control of metabolism genes in the *E. Coli* genome (38).  
344 Given that gene regulation via TI uses a low genetic footprint, TI-based genetic devices may be  
345 advantageous to the design of larger, more complex genetic programs (34). Further, coupling  
346 processivity control with interference and expression control (Fig. 1a) produces a layered response  
347 with several ‘knobs’ to tune that adjust the strength or behavior of a TI-based circuit. We therefore  
348 proposed that TI with processivity control could be used to design higher-order genetic circuits,  
349 such as two-input logic gates.

350 We recently demonstrated that TI from an inducible promoter upstream of an inducible roadblock  
351 can be rationally engineered to produce AND logic behavior responsive to two chemical inducers,  
352 aTc and IPTG (34). We also demonstrated that replacing this roadblock with an inducible promoter  
353 creates OR logic behavior after increasing the  $K_D$  of the LacI roadblock in order to allow some  
354 readthrough from the upstream promoter while lowering leaky expression from pLac. It follows  
355 then that the logic modules used to express AND and OR-like behaviors can be used to control the  
356 release of RNAPs that represses GFP expression through RNAP collisions, effectively inverting  
357 the logic from AND/OR to NOT AND/OR, i.e. NAND/NOR.

358 To create NAND behavior, we used the inducible promoter pTet and downstream protein roadblock  
359 LacI to control the release of interfering RNAPs that suppress mCherry expression through  
360 collisions (Fig. 4a, left). The release of the RNAPs is governed by a two-input AND logic gate,  
361 with aTc and IPTG as the inputs, and the interfering expressomes reduce gene expression through  
362 collisions, thereby effectively layering a NOT gate onto an AND gate, yielding NAND logic



363 behavior. Using the *gfp\*-mCherry* system for ribosome-protected processivity control, we  
364 demonstrate good NAND behavior with a 7.8-fold reduction in gene expression due to collision  
365 (Fig. 4a, right).

366 To create NOR behavior, we used a tandem promoter system composed of pLac and pTet, which  
367 was previously shown to demonstrate OR behavior (34) to the *gfp\*-mCherry* system to produce  
368 strong collisions that repress mCherry expression (Fig. 4b, left). Note that the binding affinity of  
369 LacI to the LacO binding sites in the downstream promoter was weakened through point mutations  
370 in the LacO sequence in order to increase readthrough of RNAP from the upstream promoter(34).  
371 We observed a significant ~4-fold decrease in mCherry expression when either aTc, IPTG, or both  
372 were present (Fig. 4b, left) at relatively low AHL concentrations (20  $\mu$ L). We note that at higher  
373 AHL concentrations, fold-change due to TI increases, but the NOR behavior grows asymmetric  
374 (34, 39), as the induction of both pTet and pLac at saturating conditions represses mCherry  
375 expression further than when either was individually activated (Supplementary Figure S9). This  
376 additive effect of the tandem promoters could be due to increased interfering RNAP firing,  
377 cooperative readthrough of the tandem RNAPs (40), and/or reduced promoter clogging (34, 41).  
378 Together, these results demonstrate the first use of TI collisions for the engineering of higher-order  
379 genetic devices.

## 380 **DISCUSSION**

381 The role of TI in genome-wide regulation and genome organization is still being uncovered.  
382 Recently, bacterial transcriptome studies have provided a high resolution picture of the *E. coli*  
383 transcriptome and revealed a close relationship between factor-dependent transcriptional  
384 termination and TI (5, 7, 26). Here we applied these lessons toward the design of synthetic  
385 constructs in which the processivity of an interfering RNAP is engineered to improve the strength

386 of gene repression through transcriptional collisions. We employed three processivity control  
387 strategies—the use of the Rho-inhibiting antibiotic bicyclomycin (Fig. 1b-c), the phage polarity  
388 suppressing protein Psu (Fig. 1d-f), and the co-translation with the ribosome (Fig. 2)—to tune the  
389 strength of TI collisions. We demonstrated, on a transcription-level, the improved processivity  
390 control when expressomes are permitted to enter a convergently oriented ORF (Fig. 2d) and the  
391 resulting ~38-fold reduction in transcript due to TI (Fig. 2e). We show that changing the expression  
392 level of Psu (Fig. 1f), changing strengths of interfering and expressing promoters (Supplementary  
393 Figure S7), and adjusting the length with which the expressome can interfere (Fig. 3b) can further  
394 tune TI and provide mechanistic insights into the role of antitermination in strengthening TI. We  
395 then coupled two modes of TI—roadblock and collisions—to create two-input minimal NAND  
396 and NOR logic gates (Fig. 4a-b), representing the first functionally complete Boolean gates  
397 constructed using TI collisions. Taken together, these results underscore the importance of RNAP  
398 processivity to TI and also demonstrate the tunability of processivity control to engineering TI-  
399 based genetic responses.

400 Moreover, these results further emphasize the close connection between RNAP processivity and  
401 TI in the genome. Bacteria manipulate RNAP processivity through several different  
402 antitermination mechanisms (42) including RNA aptamers (25), which were recently found to curb  
403 levels of antisense transcription and TI throughout the *E. Coli* genome (26). This suggests an  
404 evolved strategy to avoid potentially harmful TI. Conversely, the recent discovery that TI is  
405 utilized as a widespread bidirectional terminator in *E. coli* (5) raises the interesting prospect that  
406 ostensibly destructive collisions between RNAPs are evolutionarily selected for, and that genomes  
407 are in some part organized to utilize RNAP collisions for gene regulation in a small genetic space.  
408 A recent report demonstrated that head-on collisions of replisome and RNAPs increase the

409 evolvability of convergently-oriented genes through mutagenesis (43), suggesting an evolutionary  
410 selection for these convergent arrangements. Collisions between RNAPs, too, could be useful  
411 under certain circumstances. It was recently observed that a ‘non-contiguous operon’ governing  
412 menaquinone synthesis in *S. aureus* uses antisense transcription to selectively downregulate gene  
413 expression to express drug-tolerant small-colony phenotypes (44). These findings have stirred  
414 interest in TI as a mechanism shaping evolution. Extending the results of this study to the bacterial  
415 genome, it seems that the cell’s ability to alter the processivity of an RNAP through Rho-dependent  
416 transcriptional termination suggests that TI in the genome is potentially ‘tunable’. Indeed, several  
417 laboratory adaptation studies for different organisms under different stresses (45–47) have found  
418 common Rho and RNAP mutations, suggesting a potential role for TI in bacterial stress responses.

419 If genomes are arranged to facilitate collisions for regulation, could synthetic circuits also take on  
420 such an organization? Here we sought to expand TI’s potential for building genetic devices by  
421 engineering processive interfering RNAPs and introducing three distinct methods for processivity  
422 control. We note that some synthetic biology applications may require gene knockdowns higher  
423 than the 38-fold and 10-fold changes in transcript and protein, respectively, reported here. TI  
424 systems are capable of ~100-fold changes in gene expression (19, 38), but performance has been  
425 shown to depend on gene architecture, promoter strengths, and terminator strengths (9, 18–21).  
426 Optimization of these parts, in concert with the processivity control strategy detailed here, should  
427 further expand TI’s potential for synthetic biology. Recently, Krylov and colleagues demonstrated  
428 the use of an ‘actuator’ sequence element consisting of an antisense promoter, antitermination  
429 sequence to protect the antisense RNAPs from Rho termination, and an RNase III processing  
430 sequence used to downregulate expression of three *E. Coli* metabolism genes (38). The application

431 of processivity control for metabolic engineering further demonstrates the applicability of this  
432 strategy to synthetic biology.

433 Despite notable recent works, TI is still largely understudied, and the ‘rules’ determining where,  
434 when, and how RNAPs and/or the expressomes collide are not well understood. Rates of  
435 transcription and translation both in the genome and on plasmids are highly context-dependent  
436 (17, 48, 49) and depend on the position in an operon and proximity to other genes or genetic  
437 elements. Moreover, the role of supercoiling in mediating TI collisions is not well understood but  
438 is likely important in determining the strength and location of RNAP collisions in genomes across  
439 the kingdoms of life. Fundamental insights into these ‘road rules’ (41) of RNAP traffic on the  
440 DNA and the resulting TI will reveal how these molecular transcriptional events shape cell  
441 physiology and evolution.

#### 442 **SUPPLEMENTARY DATA**

443 Supplementary Data are available at NAR Online.

#### 444 **ACKNOWLEDGEMENTS**

445 The authors wish to acknowledge the GAANN fellowship given to N.J.O. through the Department  
446 of Education, the S10ODO21601 Grant given to the Flow Cytometry Facility of the University of  
447 Colorado Boulder, the Next-Gen Sequencing Core at the University of Colorado Boulder, and the  
448 National Science Foundation Grant No. MCB1714564 to A.C.

#### 449 **FUNDING**

450 National Science Foundation Grant No. MCB1714564 to A.C.

451 *Conflict of interest statement.* None declared.

452 **AUTHOR CONTRIBUTIONS**

453 N.J.O, A.E.B, and A.C designed the study. N.J.O performed the experiments and analyzed the  
454 data. N.J.O and A.C wrote the paper.

455 **REFERENCES**

- 456 1. Wade,J.T. and Grainger,D.C. (2014) Pervasive transcription: illuminating the dark matter of  
457 bacterial transcriptomes. *Nat. Rev. Microbiol.*, **12**, 647–653.
- 458 2. Hongay,C.F., Grisafi,P.L., Galitski,T. and Fink,G.R. (2006) Antisense transcription controls  
459 cell fate in *Saccharomyces cerevisiae*. *Cell*, **127**, 735–45.
- 460 3. Muniz,L., Deb,M.K., Aguirrebengoa,M., Lazorthes,S., Trouche,D., Muniz,L., Deb,M.K.,  
461 Aguirrebengoa,M., Lazorthes,S. and Trouche,D. (2017) Control of Gene Expression in  
462 Senescence through Transcriptional Read-Through of Convergent Article Control of Gene  
463 Expression in Senescence through Transcriptional Read-Through of Convergent Protein-  
464 Coding Genes. *Cell Rep.*, **21**, 2433–2446.
- 465 4. Chatterjee,A., Johnson,C.M., Shu,C.-C., Kaznessis,Y.N., Ramkrishna,D., Dunny,G.M. and  
466 Hu,W.-S. (2011) Convergent transcription confers a bistable switch in *Enterococcus*  
467 *faecalis* conjugation. *Proc. Natl. Acad. Sci. U. S. A.*, **108**, 9721–6.
- 468 5. Ju,X., Li,D. and Liu,S. (2019) Full-length RNA profiling reveals pervasive bidirectional  
469 transcription terminators in bacteria. *Nat. Microbiol.*, 10.1038/s41564-019-0500-z.
- 470 6. Peters,J.M., Mooney,R.A., Grass,J.A., Jessen,E.D., Tran,F. and Landick,R. (2012) Rho and  
471 NusG suppress pervasive antisense transcription in *Escherichia coli*. *Genes Dev.*, **26**, 2621–  
472 2633.

- 473 7. Dar,D. and Sorek,R. (2018) High-resolution RNA 3-ends mapping of bacterial Rho-dependent  
474 transcripts. *Nucleic Acids Res.*, **46**, 6797–6805.
- 475 8. Courtney,C. and Chatterjee,A. (2014) cis-Antisense RNA and Transcriptional Interference:  
476 Coupled Layers of Gene Regulation. *J Gene Ther.*, **2**, 1–9.
- 477 9. Bordoy,A.E. and Chatterjee,A. (2015) Cis-Antisense Transcription Gives Rise to Tunable  
478 Genetic Switch Behavior: A Mathematical Modeling Approach. *PLoS One*, **10**, e0133873.
- 479 10. Pelechano,V. and Steinmetz,L.M. (2013) Gene regulation by antisense transcription. *Nat.*  
480 *Rev. Genet.*, **14**, 880–93.
- 481 11. Shearwin,K.E., Callen,B.P. and Egan,J.B. (2005) Transcriptional interference - A crash  
482 course. *Trends Genet.*, **21**, 339–345.
- 483 12. Georg,J. and Hess,W.R. (2011) cis-Antisense RNA, Another Level of Gene Regulation in  
484 Bacteria. *Microbiol. Mol. Biol. Rev.*, **75**, 286–300.
- 485 13. Palmer,A.C., Ahlgren-Berg,A., Egan,J.B., Dodd,I.B. and Shearwin,K.E. (2009) Potent  
486 transcriptional interference by pausing of RNA polymerases over a downstream promoter.  
487 *Mol. Cell*, **34**, 545–55.
- 488 14. Sneppen,K., Dodd,I.B., Shearwin,K.E., Palmer,A.C., Schubert,R. a, Callen,B.P. and  
489 Egan,J.B. (2005) A mathematical model for transcriptional interference by RNA  
490 polymerase traffic in Escherichia coli. *J. Mol. Biol.*, **346**, 399–409.
- 491 15. Crampton,N., Bonass,W.A., Kirkham,J., Rivetti,C. and Thomson,N.H. (2006) Collision  
492 events between RNA polymerases in convergent transcription studied by atomic force  
493 microscopy. *Nucleic Acids Res.*, **34**, 5416–25.

- 494 16. Meyer,S. and Beslon,G. (2014) Torsion-Mediated Interaction between Adjacent Genes. *PLoS*  
495 *Comput. Biol.*, **10**, e1003785.
- 496 17. Yeung,E., Dy,A.J., Martin,K.B., Beck,J.L., Collins,J.J., Murray,R.M., Yeung,E., Dy,A.J.,  
497 Martin,K.B., Ng,A.H., *et al.* (2017) Biophysical Constraints Arising from Compositional  
498 Context in Synthetic Gene Networks Article Biophysical Constraints Arising from  
499 Compositional Context in Synthetic Gene Networks. *Cell Syst.*, **5**, 11-24.e12.
- 500 18. Bordoy,A.E., Varanasi,U.S., Courtney,C.M. and Chatterjee,A. (2016) Transcriptional  
501 Interference in Convergent Promoters as a Means for Tunable Gene Expression. *ACS Synth.*  
502 *Biol.*, **5**, 1331–1341.
- 503 19. Brophy,J.A.N. and Voigt,C.A. (2016) Antisense transcription as a tool to tune gene  
504 expression. *Mol. Syst. Biol.*
- 505 20. Hoffmann,S.A., Kruse,S.M. and Arndt,K.M. (2016) Long-range transcriptional interference  
506 in *E. coli* used to construct a dual positive selection system for genetic switches. *Nucleic*  
507 *Acids Res.*, **44**, gkw125-.
- 508 21. Hoffmann,S.A., Hao,N., Shearwin,K.E. and Arndt,K.M. (2019) Characterizing  
509 Transcriptional Interference between Converging Genes in Bacteria. *ACS Synth. Biol.*, **8**,  
510 466–473.
- 511 22. Hao,N., Palmer,A.C., Ahlgren-Berg,A., Shearwin,K.E. and Dodd,I.B. (2016) The role of  
512 repressor kinetics in relief of transcriptional interference between convergent promoters.  
513 *Nucleic Acids Res.*, 10.1093/nar/gkw600.
- 514 23. McGary,K. and Nudler,E. (2013) RNA polymerase and the ribosome: The close relationship.

- 515 *Curr. Opin. Microbiol.*, **16**, 112–117.
- 516 24. Cardinale,C.J., Washburn,R.S., Tadigotla,V.R., Brown,L.M., Gottesman,M.E. and Nudler,E.  
517 (2008) Termination Factor Rho and Its. *Science (80-. )*, **320**, 935–938.
- 518 25. Sedlyarova,N., Rescheneder,P., Magán,A., Popitsch,N., Rziha,N., Bilusic,I., Epshtein,V.,  
519 Zimmermann,B., Lybecker,M., Sedlyarov,V., *et al.* (2017) Natural RNA Polymerase  
520 Aptamers Regulate Transcription in E. coli. *Mol. Cell*, **67**, 30-43.e6.
- 521 26. Magan,A., Amman,F., El-isa,F., Hartl,N., Shamovsky,I., Sedlyarova,N. and Nudler,E. (2019)  
522 iRAPs curb antisense transcription in E . coli. 10.1093/nar/gkz791.
- 523 27. Skordalakes,E., Brogan,A.P., Park,B.S., Kohn,H. and Berger,J.M. (2005) Structural  
524 Mechanism of Inhibition of the Rho Transcription Termination Factor by the Antibiotic  
525 Bicyclomycin. *Structure*, **13**, 99–109.
- 526 28. Pani,B., Banerjee,S., Chalissery,J., Abishek,M., Loganathan,R.M., Suganthan,R.B. and  
527 Sen,R. (2006) Mechanism of inhibition of Rho-dependent transcription termination by  
528 bacteriophage P4 protein Psu. *J. Biol. Chem.*, **281**, 26491–26500.
- 529 29. Ranjan,A., Banerjee,R., Pani,B., Sen,U. and Sen,R. (2013) The moonlighting function of  
530 bacteriophage P4 capsid protein, Psu, as a transcription antiterminator. *Bacteriophage*, **3**,  
531 e25657.
- 532 30. Hussein,R., Lee,T.Y. and Lim,H.N. (2015) Quantitative characterization of gene regulation  
533 by Rho dependent transcription termination. *Biochim. Biophys. Acta - Gene Regul. Mech.*,  
534 **1849**, 940–954.
- 535 31. Artsimovitch,I. (2018) Rebuilding the bridge between transcription and translation. *Mol.*



- 536 *Microbiol.*, **108**, 467–472.
- 537 32. Proshkin,S., Rahmouni,A.R., Mironov,A. and Nudler,E. (2010) Cooperation Between  
538 Translating Ribosomes and RNA Polymerase in Transcription Elongation. *Science (80-. )*,  
539 **328**, 504–508.
- 540 33. Kohler,R., Mooney,R.A., Mills,D.J., Landick,R. and Cramer,P. (2017) Architecture of a  
541 transcribing-translating expressome. *Science (80-. )*, **356**, 194 LP-- 197.
- 542 34. Bordoy,A.E., O'Connor,N.J. and Chatterjee,A. (2019) Construction of Two-Input Logic  
543 Gates Using Transcriptional Interference. *ACS Synth. Biol.*, **8**, 2428–2441.
- 544 35. Peters,J.M., Mooney,R.A., Kuan,P.F., Rowland,J.L., Keles,S. and Landick,R. (2009) Rho  
545 directs widespread termination of intragenic and stable RNA transcription. *Proc. Natl.*  
546 *Acad. Sci.*, **106**, 15406–15411.
- 547 36. Sung,K.L., Chou,H.H., Pflieger,B.F., Newman,J.D., Yoshikuni,Y. and Keasling,J.D. (2007)  
548 Directed evolution of AraC for improved compatibility of arabinose- and lactose-inducible  
549 promoters. *Appl. Environ. Microbiol.*, **73**, 5711–5715.
- 550 37. Orosz,A., Boros,I. and Venetianer,P. (1991) Analysis of the complex transcription  
551 termination region of the Escherichia coli rrn B gene. *Eur. J. Biochem.*, **201**, 653–659.
- 552 38. Krylov,A.A., Shapovalova,V. V., Miticheva,E.A., Shupletsov,M.S. and Mashko,S. V. (2020)  
553 Universal Actuator for Efficient Silencing of Escherichia coli Genes Based on Convergent  
554 Transcription Resistant to Rho-Dependent Termination. *ACS Synth. Biol.*, **9**, 1650–1664.
- 555 39. Cox,R.S., Surette,M.G. and Elowitz,M.B. (2007) Programming gene expression with  
556 combinatorial promoters. *Mol. Syst. Biol.*, **3**, 145.

- 557 40. Epshtein, V., Toulmé, F., Rahmouni, A.R., Borukhov, S. and Nudler, E. (2003) Transcription  
558 through the roadblocks: the role of RNA polymerase cooperation. *EMBO J.*, **22**, 4719–  
559 4727.
- 560 41. Hao, N., Krishna, S., Ahlgren-Berg, A., Cutts, E.E., Shearwin, K.E. and Dodd, I.B. (2014) Road  
561 rules for traffic on DNA—systematic analysis of transcriptional roadblocking in vivo.  
562 *Nucleic Acids Res.*, **42**, 8861–8872.
- 563 42. Santangelo, T.J. and Artsimovitch, I. (2011) Termination and antitermination: RNA  
564 polymerase runs a stop sign. *Nat. Rev. Microbiol.*, **9**, 319–329.
- 565 43. Merrikh, C.N. and Merrikh, H. (2018) Gene inversion potentiates bacterial evolvability and  
566 virulence. *Nat. Commun.*, **9**.
- 567 44. Sáenz-lahoya, S., Bitarte, N., García, B., Burgui, S., Vergara-irigaray, M., Valle, J., Solano, C.  
568 and Toledo-arana, A. (2018) Noncontiguous operon is a genetic organization for  
569 coordinating bacterial gene expression. *PNAS*, **116**, 1733–1738.
- 570 45. Tenailon, O., Rodríguez-Verdugo, A., Gaut, R.L., McDonald, P., Bennett, A.F., Long, A.D. and  
571 Gaut, B.S. (2012) The Molecular Diversity of Adaptive Convergence. *Science (80-. )*, **335**,  
572 457–462.
- 573 46. Freddolino, P.L., Goodarzi, H. and Tavazoie, S. (2012) Fitness landscape transformation  
574 through a single Amino acid change in the rho terminator. *PLoS Genet.*, **8**.
- 575 47. Lee, Y.H. and Helmann, J.D. (2014) Mutations in the primary sigma factor  $\sigma^A$  and  
576 termination factor rho that reduce susceptibility to cell wall antibiotics. *J. Bacteriol.*, **196**,  
577 3700–3711.

- 578 48. Lim,H.N., Lee,Y. and Hussein,R. (2011) Fundamental relationship between operon  
579 organization and gene expression. *Proc. Natl. Acad. Sci.*, **108**, 10626–10631.
- 580 49. Scholz,S.A., Diao,R., Wolfe,M.B., Fivenson,E.M., Lin,X.N. and Freddolino,P.L. (2019)  
581 High-Resolution Mapping of the Escherichia coli Chromosome Reveals Positions of High  
582 and Low Transcription. *Cell Syst.*, **8**, 212-225.e9.
- 583

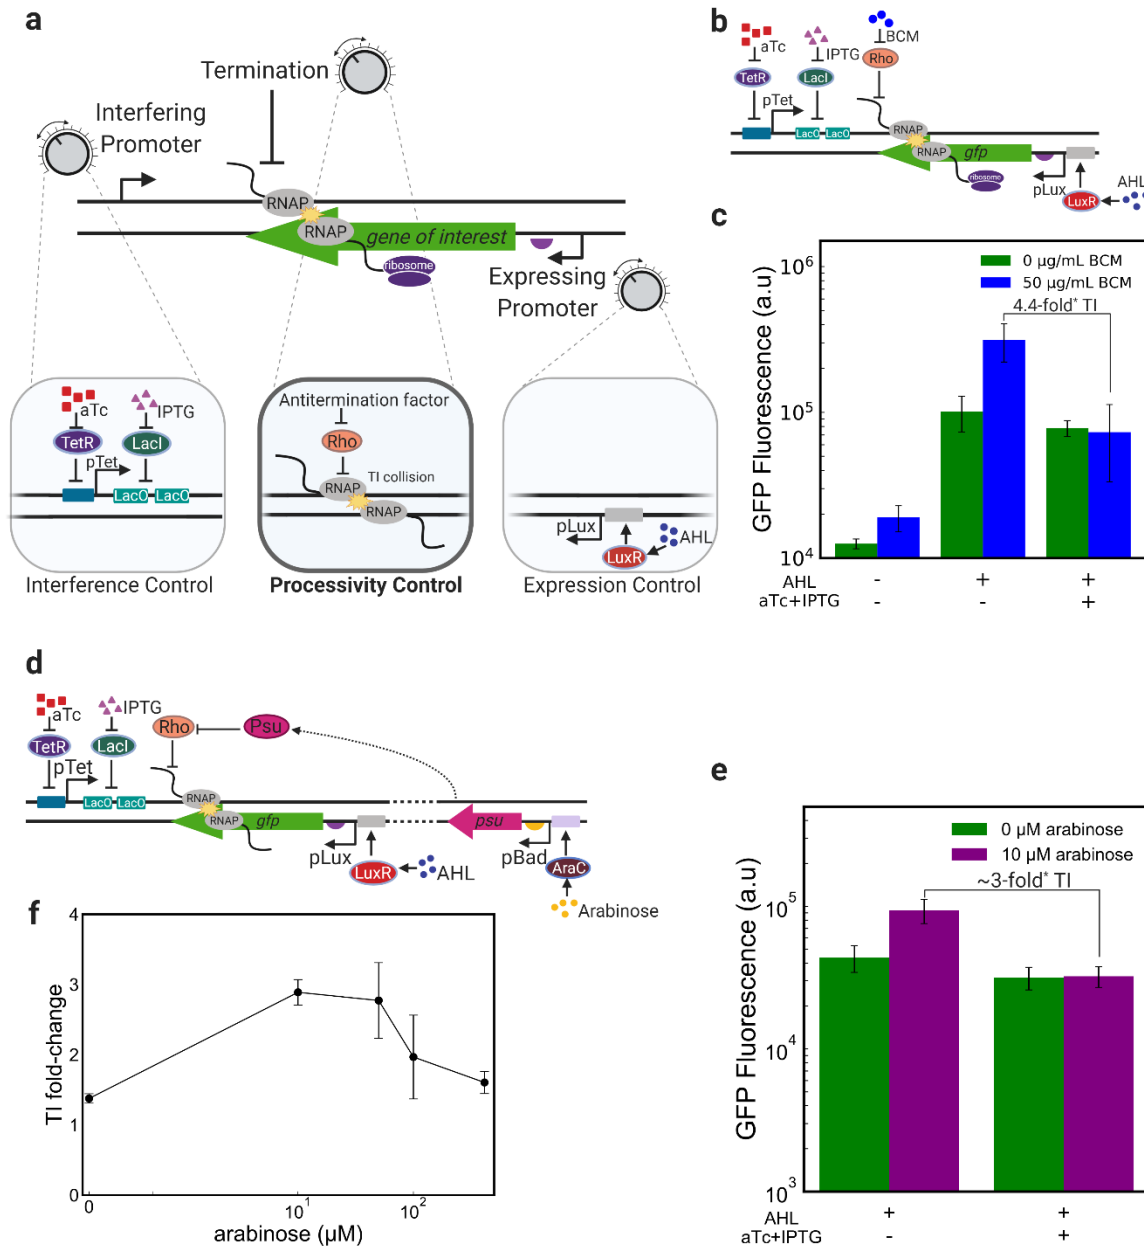

588 **Figure 1: High processivity of interfering RNAPs is essential for strong TI.** a) RNAP collision  
 589 based transcriptional interference (TI) is tunable through the expression and interfering promoter  
 590 strengths and RNAP processivity. Processivity control through antitermination of the interfering  
 591 RNAP represents a novel strategy to engineer TI. b) Diagram showing the genetic elements  
 592 comprising our inducible TI system and illustrating the effects of Rho and its inhibitor antibiotic,  
 593 bicyclomycin (BCM) on the course of the interfering RNAP c) The addition of bicyclomycin

594 (BCM) generates TI through the suppression of Rho termination of the interfering RNAP. d)  
595 Diagram of arabinose-inducible Rho inhibition via Psu. The protein Psu is under the control of the  
596 arabinose-inducible pBad promoter. e) Sublethal Psu expression with 10  $\mu$ M of arabinose creates  
597 roughly 8-fold TI. In this experiment, AHL was present at a concentration of 100  $\mu$ M, aTc was  
598 present at a concentration of 100 ng/mL and IPTG was present at a concentration of 1 mM. f) This  
599 construct shows a tunable TI system, with arabinose activating expression of Psu, which inhibits  
600 Rho and thereby improves the processivity of the interfering RNAP and strengthens TI. Error bars  
601 are denoted as  $\pm$  s.d. Statistical significance as determined through the Mann-Whitney U test  
602 ( $p < 0.05$ ) denoted as \*. n=3 biological replicates.

603

604

605

606

607

608

609

610

611

612

613

614

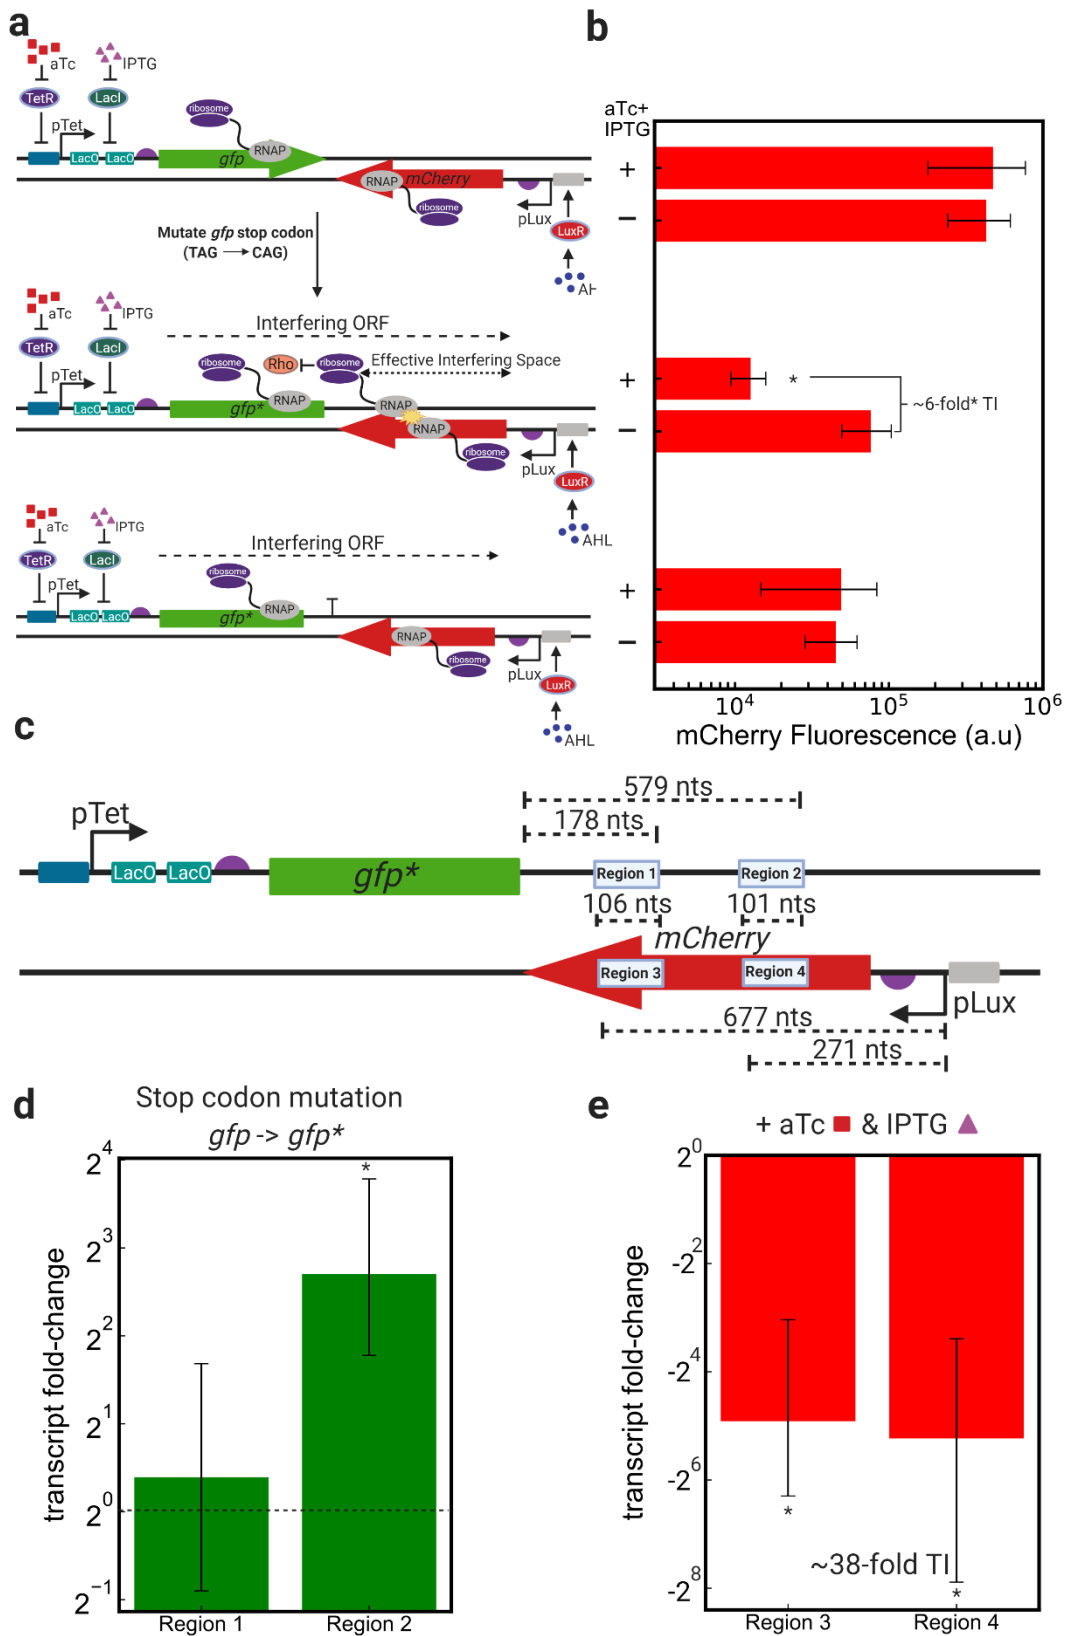

615 **Figure 2: Protecting the interfering RNAP in an expressome complex improves processivity**  
 616 **and creates strong TI.** a) Designs of convergent *gfp-mCherry* constructs: (from top to bottom),

617 convergent *gfp* and *mCherry* genes under the control of pTet+LacO and AHL, respectively;  
618 convergent *gfp* and *mCherry* genes with the *gfp* stop codon mutated to a glutamine (Gln) amino  
619 acid (denoted as *gfp\**), thereby extending the ORF originating from downstream of the pTet-LacO  
620 5'-UTR through the mCherry ORF until 2 bp before the pLux transcription start site; a strong  
621 unidirectional terminator was inserted downstream of *gfp\** to impede the progress of the interfering  
622 expressome. b) mCherry expression with 120  $\mu$ M AHL and with and without 100 ng/mL aTc and  
623 1 mM IPTG demonstrates the effects of TI on mCherry expression in all constructs. c) Strand-  
624 specific qPCR was used to target transcripts containing regions of the antisense (Regions 1 and 2)  
625 and sense (Regions 3 and 4) *mCherry* transcripts. Regions 1 and 3 and Regions 2 and 4 represent  
626 the same amplicons, of sizes 106 and 101 nts, respectively, with different gene-specific cDNA  
627 priming (Materials and Methods). d) Measuring antisense *mCherry* transcript fold-change (using  
628 *Kan* as a reference) upon *gfp* stop codon mutation (comparing *gfp-mCherry* to *gfp\*-mCherry*)  
629 shows improved processivity (increase in Region 2 transcripts) upon ribosome-RNAP coupling.  
630 Cells containing both constructs were grown in the absence of any AHL (no pLux activation) and  
631 in the presence of 100 ng/mL aTc and 1 mM IPTG, in order to measure processivity of the  
632 interfering RNAP. Data titled 'Region 1' and 'Region 2' represent transcripts that contain those  
633 amplicon regions (Materials and Methods). d) Measuring sense *mCherry* transcript fold-change  
634 (using *Kan* as a reference) upon interfering promoter activation (comparing AHL-only condition  
635 to AHL with aTc+IPTG) shows ~38-fold TI (decrease in Regions 3 and 4 transcripts) upon  
636 interfering promoter activation. Cells containing both constructs were grown with 200  $\mu$ M AHL  
637 (full pLux activation) and in the presence or absence of 100 ng/mL aTc and 1 mM IPTG in order  
638 to measure knockdown of the *mCherry* transcript due to TI. Fold-change represents reduction in  
639 transcript levels upon the activation of the interfering promoter, pTet, with aTc and IPTG. Data

640 titled 'Region 3' and 'Region 4' represent transcripts that contain those amplicon regions  
641 (Materials and Methods). For figures d and e: fold-change represents changes in transcript levels  
642 ( $2^{-\Delta\Delta C_T}$ ) upon either mutation of stop codon (d) or induction of interfering promoter (e). Error bars  
643 are denoted as  $\pm$  s.d, in (d-e) represented as ( $2^{-(\Delta\Delta C_T+s.d)}$ ,  $2^{-(\Delta\Delta C_T-s.d)}$ ). \* indicates significance  
644 (Mann-Whitney U-test (b), one-sample T-test (d-e),  $p < 0.05$ ) in the expression differences of  
645 induced vs. uninduced interfering promoter (b) or of the  $\Delta\Delta C_T$  values with respect the null-  
646 hypothesis of  $\Delta\Delta C_T=0$  d-e). n=3 biological replicates.

647



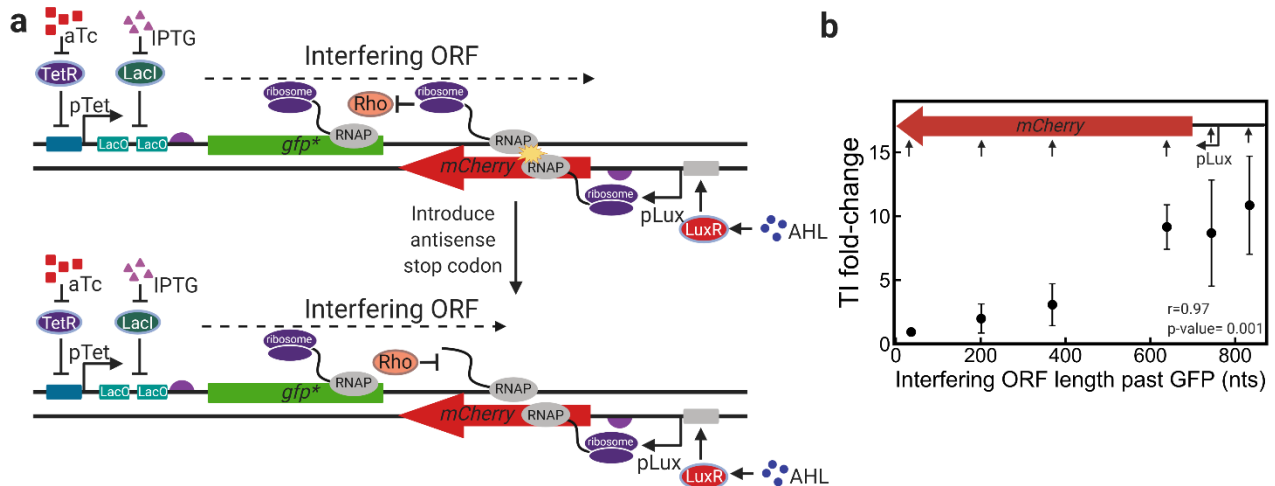

648 **Figure 3: TI from a ribosome-protected interfering RNAP is tunable.** Using codon  
649 degeneracy, stop codons were introduced in the mCherry antisense sequence, maintaining the  
650 mCherry amino acid sequence. a) An example illustrating how these stop codon-introducing point  
651 mutations shorten the ‘interfering ORF’ of the interfering expressome. When the interfering ORF  
652 is shorter, Rho has a higher chance of terminating transcription of the interfering RNAP and  
653 reducing the amount of observed TI. b) Measuring TI for each construct at identical AHL, aTc,  
654 and IPTG concentrations, a trend emerges in which the length of the ORF starting from the start  
655 codon of *gfp\** within the *mCherry* gene dictates the extent of TI. The significant ( $p$ -value $<0.05$ )  
656 Pearson correlation coefficient suggests a positive relationship between interfering ORF length and  
657 TI fold-change. The inserted pLux - *mCherry* region at the top of the figure shows the positions of  
658 the stop codons (represented here as upward arrows) introduced into the antisense strand. The x-  
659 axis denotes how many nts the interfering expressome will read before encountering a stop codon.  
660 Error bars are denoted as  $\pm$  s.d with  $n \geq 4$  biological replicates.

661

662

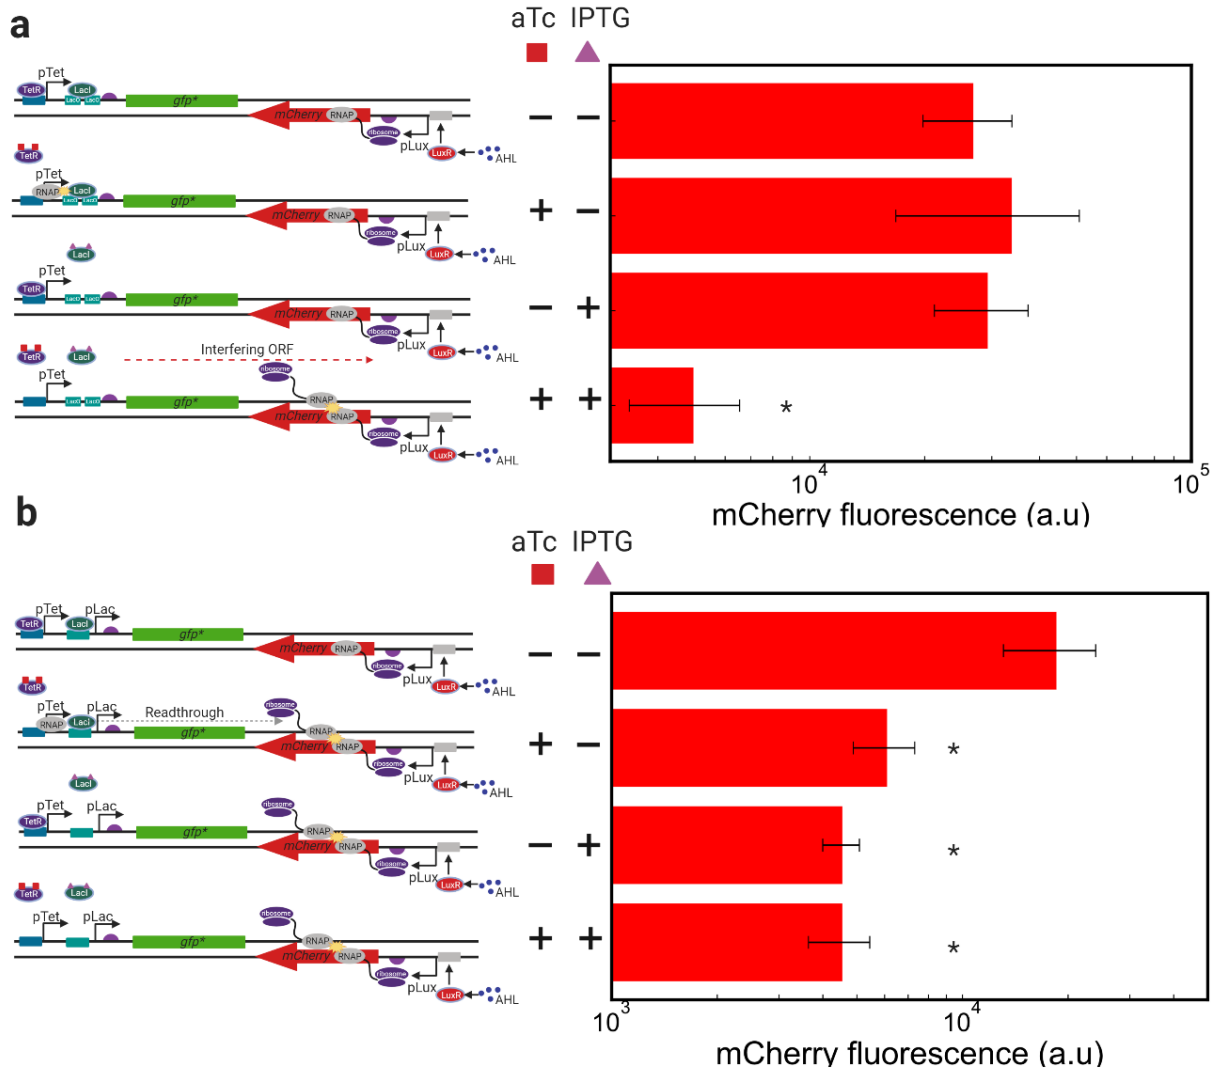

663 **Figure 4: NAND and NOR behaviors arise from coupled roadblock and collisions.** Inverting  
 664 the orientation of a gene of interest in an AND or OR gate creates NAND and NOR logic via TI  
 665 collisions. a) Using AND logic with an inducible pTet promoter and LacO operator to control the  
 666 release of interfering expressomes to collide an interfere mCherry expression creates NAND logic  
 667 behavior. mCherry expression is plotted with i) no inducer, ii) saturating aTc only, iii) saturating  
 668 IPTG only, and iv) saturating aTc + IPTG, revealing NAND behavior for this construct. b) Using  
 669 OR logic with a tandem pTet and pLac promoter system generates NOR logic behavior. mCherry  
 670 expression is plotted with i) no inducer, ii) saturating aTc only, iii) saturating IPTG only, and iv)

671 saturating aTc + IPTG, revealing NOR behavior for this construct. \* denotes statistical  
672 significance compared to the 'ON' condition ( $p < 0.05$ , Mann-Whitney  $U$  test, with  $n > 3$  replicates.)

673

674

675

676

677

678
